# Supplementary material
Source: PubMed Central journal article supplement (PMC4633366)
Supplement: NIHMS728133-supplement-1.pdf [file NIHMS728133-supplement-1.pdf]

Supplementary Table S1: Association between rs13387042 (2q35) and estrogen receptor status-specific breast cancer risk, stratified by Indigenous American genetic ancestry, hormone therapy use, and breastfeeding in Hispanic women from the Breast Cancer Health Disparities Study

| <b>ER positive</b>                                                                    |              | <b>controls/cases</b> | <b>Odds Ratio*</b> | <b>95% CI</b> | <b>P value</b> | <b>P Interaction</b> | <b>P LRT**</b> |
|---------------------------------------------------------------------------------------|--------------|-----------------------|--------------------|---------------|----------------|----------------------|----------------|
| <b>Stratified by Indigenous American ancestry</b>                                     |              |                       |                    |               |                |                      |                |
| Low                                                                                   |              | 280/142               | 1.17               | 0.87-1.56     | 0.304          | 0.649                |                |
| Intermediate                                                                          |              | 1697/530              | 1.24               | 1.07-1.44     | 0.004          |                      |                |
| High                                                                                  |              | 633/48                | 1.35               | 0.72-2.53     | 0.356          |                      |                |
| <b>Stratified by hormone therapy use in postmenopausal women</b>                      |              |                       |                    |               |                |                      |                |
| Current                                                                               |              | 258/181               | 1.12               | 0.84-1.51     | 0.433          | 0.279                |                |
| Former                                                                                |              | 361/75                | 1.42               | 1.00-2.01     | 0.052          |                      |                |
| Never                                                                                 |              | 874/174               | 1.43               | 1.10-1.86     | 0.008          |                      |                |
| <b>Stratified by breastfeeding in premenopausal women</b>                             |              |                       |                    |               |                |                      |                |
| Never                                                                                 |              | 163/63                | 1.1                | 0.69-1.78     | 0.682          | 0.246                |                |
| ≤12 months                                                                            |              | 500/94                | 0.83               | 0.60-1.26     | 0.468          |                      |                |
| >12 months                                                                            |              | 273/52                | 1.53               | 1.00-2.34     | 0.051          |                      |                |
| <b>Stratified by hormone therapy use and genetic ancestry in postmenopausal women</b> |              |                       |                    |               |                |                      |                |
| Current                                                                               | Low          | 46/48                 | 1.06               | 0.59-1.89     | 0.848          | 0.58                 | 0.444          |
|                                                                                       | Intermediate | 206/124               | 1.14               | 0.80-1.63     | 0.475          |                      |                |
|                                                                                       | High         | 6/9                   | NA                 | NA            | NA             |                      |                |
| Former                                                                                | Low          | 53/12                 | 0.92               | 0.32-2.65     | 0.875          | 0.102                |                |
|                                                                                       | Intermediate | 248/60                | 1.55               | 1.04-2.33     | 0.033          |                      |                |
|                                                                                       | High         | 60/3                  | NA                 | NA            | NA             |                      |                |
| Never                                                                                 | Low          | 67/29                 | 2.05               | 1.04-4.04     | 0.039          | 0.609                |                |
|                                                                                       | Intermediate | 518/131               | 1.27               | 0.93-1.73     | 0.127          |                      |                |
|                                                                                       | High         | 289/14                | 1.91               | 0.59-6.20     | 0.279          |                      |                |
| <b>Stratified by breastfeeding and genetic ancestry in premenopausal women</b>        |              |                       |                    |               |                |                      |                |
| Never                                                                                 | Low          | 13/4                  | NA                 | NA            | NA             | NA                   | 0.152          |
|                                                                                       | Intermediate | 127/51                | 1.07               | 0.63-1.82     | 0.81           |                      |                |
|                                                                                       | High         | 23/8                  | NA                 | NA            | NA             |                      |                |
| ≤12 months                                                                            | Low          | 40/25                 | 0.52               | 0.21-1.29     | 0.159          | 0.254                |                |
|                                                                                       | Intermediate | 287/64                | 0.92               | 0.60-1.42     | 0.706          |                      |                |
|                                                                                       | High         | 173/5                 | 0.97               | 0.09-10.01    | 0.981          |                      |                |
| >12 months                                                                            | Low          | 27/9                  | 1.22               | 0.38-3.91     | 0.734          | 0.903                |                |
|                                                                                       | Intermediate | 190/39                | 1.77               | 1.08-2.89     | 0.024          |                      |                |
|                                                                                       | High         | 56/4                  | NA                 | NA            | NA             |                      |                |

| <b>ER negative</b>                                                                    |              | <b>controls/cases</b> | <b>Odds Ratio*</b> | <b>95% CI</b> | <b>P value</b> | <b>P Interaction</b> | <b>P LRT**</b> |
|---------------------------------------------------------------------------------------|--------------|-----------------------|--------------------|---------------|----------------|----------------------|----------------|
| <b>Stratified by Indigenous American ancestry</b>                                     |              |                       |                    |               |                |                      |                |
| Low                                                                                   |              | 280/47                | 0.71               | 0.45-1.14     | 0.158          | 0.046                |                |
| Intermediate                                                                          |              | 1697/195              | 1.23               | 0.99-1.53     | 0.064          |                      |                |
| High                                                                                  |              | 633/15                | 0.83               | 0.30-2.25     | 0.709          |                      |                |
| <b>Stratified by hormone therapy use in postmenopausal women</b>                      |              |                       |                    |               |                |                      |                |
| Current                                                                               |              | 258/38                | 0.86               | 0.51-1.45     | 0.568          | 0.289                |                |
| Former                                                                                |              | 361/27                | 1.1                | 0.64-1.89     | 0.736          |                      |                |
| Never                                                                                 |              | 874/57                | 1.2                | 0.80-1.181    | 0.374          |                      |                |
| <b>Stratified by breastfeeding in premenopausal women</b>                             |              |                       |                    |               |                |                      |                |
| Never                                                                                 |              | 163/22                | 0.97               | 0.49-1.92     | 0.923          | 0.66                 |                |
| ≤12 months                                                                            |              | 500/48                | 1.47               | 0.93-2.32     | 0.096          |                      |                |
| >12 months                                                                            |              | 273/34                | 1.28               | 0.77-2.11     | 0.342          |                      |                |
| <b>Stratified by hormone therapy use and genetic ancestry in postmenopausal women</b> |              |                       |                    |               |                |                      |                |
| Current                                                                               | Low          | 46/3                  | 0.1                | NA            | 0.26           | 0.829                | 0.649          |
|                                                                                       | Intermediate | 206/33                | 0.88               | 0.49-1.58     | 0.67           |                      |                |
|                                                                                       | High         | 6/2                   | NA                 | NA            | NA             |                      |                |
| Former                                                                                | Low          | 53/8                  | 0.44               | 0.13-1.53     | 0.198          | 0.339                |                |
|                                                                                       | Intermediate | 248/18                | 1.47               | 0.75-2.91     | 0.259          |                      |                |
|                                                                                       | High         | 60/1                  | NA                 | NA            | NA             |                      |                |
| Never                                                                                 | Low          | 67/8                  | 0.31               | 0.08-1.25     | 0.101          | 0.119                |                |
|                                                                                       | Intermediate | 518/47                | 1.36               | 0.86-2.15     | 0.311          |                      |                |
|                                                                                       | High         | 289/2                 | 4.09               | 0.12-136      | 0.432          |                      |                |
| <b>Stratified by breastfeeding and genetic ancestry in premenopausal women</b>        |              |                       |                    |               |                |                      |                |
| Never                                                                                 | Low          | 13/4                  | 0.6                | 0.05-6.83     | 0.681          | 0.294                | 0.678          |
|                                                                                       | Intermediate | 127/17                | 1.1                | 0.50-2.42     | 0.818          |                      |                |
|                                                                                       | High         | 23/1                  | NA                 | NA            | NA             |                      |                |
| ≤12 months                                                                            | Low          | 40/10                 | 2.98               | 0.80-11.12    | 0.104          | 0.905                |                |
|                                                                                       | Intermediate | 287/36                | 1.22               | 0.73-2.05     | 0.453          |                      |                |
|                                                                                       | High         | 173/2                 | 2.96               | 0.09-97.59    | 0.543          |                      |                |
| >12 months                                                                            | Low          | 27/4                  | 0.36               | 0.04-3.11     | 0.354          | 0.561                |                |
|                                                                                       | Intermediate | 190/28                | 1.39               | 0.80-2.40     | 0.243          |                      |                |
|                                                                                       | High         | 56/2                  | 4.45               | 0.07-287      | 0.483          |                      |                |

\*OR per additional A allele

\*\*P likelihood ratio test comparing the model with interaction between SNP and ancestry, adjusting by environmental risk factor to a model with SNP by ancestry interaction and SNP by risk factor interaction.
