# Supplementary material
Source: PubMed Central journal article supplement (PMC4633366)
Supplement: NIHMS728133-supplement-3.pdf [file NIHMS728133-supplement-3.pdf]

**Supplementary Table S3: Association between rs13387042 and rs7696175 and breast cancer risk, stratified by risk factor\* and Indigenous American (IA) genetic ancestry in Hispanic women from the Breast Cancer Health Disparities Study**

| SNP rs number                                                                      | Variable Categories      | IA Ancestry         | N      | OR   | P      | 95%CI     | P Interaction**                                     |
|------------------------------------------------------------------------------------|--------------------------|---------------------|--------|------|--------|-----------|-----------------------------------------------------|
| <b>rs13387042 &amp; Postmenopausal Hormone therapy use</b>                         |                          |                     |        |      |        |           |                                                     |
| rs13387042                                                                         |                          | Low IA anc          | N=324  | 1.07 | 0.679  | 0.78-1.44 | 0.055                                               |
| rs13387042                                                                         |                          | Intermediate IA anc | N=1793 | 1.19 | 0.014  | 1.03-1.36 |                                                     |
| rs13387042                                                                         |                          | High IA anc         | N=591  | 1.46 | 0.013  | 1.08-1.97 |                                                     |
| rs13387042                                                                         | Hormone therapy: current |                     | N=575  | 0.94 | 0.644  | 0.74-1.20 | 0.002                                               |
| rs13387042                                                                         | Hormone therapy: former  |                     | N=592  | 1.20 | 0.134  | 0.94-1.53 |                                                     |
| rs13387042                                                                         | Hormone therapy: never   |                     | N=1521 | 1.49 | <0.001 | 1.28-1.75 |                                                     |
| <b>Model with both Hormone therapy use*SNP and Ancestry*SNP interaction terms</b>  |                          |                     |        |      |        |           |                                                     |
| rs13387042                                                                         | Hormone therapy: current | Low IA anc          | N=113  | 1.10 | 0.733  | 0.64-1.87 | Hormone therapy*SNP = 0.013<br>Ancestry*SNP = 0.353 |
| rs13387042                                                                         |                          | Intermediate IA anc | N=439  | 0.90 | 0.473  | 0.67-1.20 |                                                     |
| rs13387042                                                                         |                          | High IA anc         | N=22   | 0.05 | 0.128  | 0.00-2.41 |                                                     |
| rs13387042                                                                         | Hormone therapy: former  | Low IA anc          | N=80   | 0.57 | 0.144  | 0.27-1.21 |                                                     |
| rs13387042                                                                         |                          | Intermediate IA anc | N=407  | 1.24 | 0.156  | 0.92-1.67 |                                                     |
| rs13387042                                                                         |                          | High IA anc         | N=101  | 1.39 | 0.413  | 0.63-3.02 |                                                     |
| rs13387042                                                                         | Hormone therapy: never   | Low IA anc          | N=127  | 1.64 | 0.060  | 0.97-2.73 |                                                     |
| rs13387042                                                                         |                          | Intermediate IA anc | N=929  | 1.29 | 0.015  | 1.05-1.57 |                                                     |
| rs13387042                                                                         |                          | High IA anc         | N=465  | 1.72 | 0.002  | 1.21-2.42 |                                                     |
| <b>rs13387042 &amp; months breastfeeding</b>                                       |                          |                     |        |      |        |           |                                                     |
| rs13387042                                                                         |                          | Low IA anc          | N=557  | 1.10 | 0.441  | 0.87-1.39 | 0.051                                               |
| rs13387042                                                                         |                          | Intermediate IA anc | N=3098 | 1.17 | 0.003  | 1.06-1.30 |                                                     |
| rs13387042                                                                         |                          | High IA anc         | N=1078 | 1.47 | 0.001  | 1.17-1.83 |                                                     |
| rs13387042                                                                         | Never                    |                     | N=1081 | 1.14 | 0.136  | 0.96-1.36 | 0.06                                                |
| rs13387042                                                                         | ≤12 months               |                     | N=2037 | 1.20 | 0.007  | 1.05-1.37 |                                                     |
| rs13387042                                                                         | >12 months               |                     | N=1177 | 1.43 | <0.001 | 1.20-1.70 |                                                     |
| <b>Model with both months breastfeeding*SNP and Ancestry*SNP interaction terms</b> |                          |                     |        |      |        |           |                                                     |
| rs13387042                                                                         | Never                    | Low IA anc          | N=149  | 0.89 | 0.618  | 0.56-1.41 | Breastfeeding*SNP = 0.093<br>Ancestry*SNP = 0.103   |
| rs13387042                                                                         |                          | Intermediate IA anc | N=799  | 1.14 | 0.215  | 0.93-1.40 |                                                     |
| rs13387042                                                                         |                          | High IA anc         | N=130  | 1.15 | 0.678  | 0.60-2.21 |                                                     |
| rs13387042                                                                         | ≤12 months               | Low IA anc          | N=199  | 1.01 | 0.95   | 0.67-1.54 |                                                     |
| rs13387042                                                                         |                          | Intermediate IA anc | N=1231 | 1.06 | 0.467  | 0.90-1.26 |                                                     |
| rs13387042                                                                         |                          | High IA anc         | N=607  | 1.41 | 0.021  | 1.05-1.90 |                                                     |
| rs13387042                                                                         | >12 months               | Low IA anc          | N=135  | 1.38 | 0.199  | 0.84-2.26 |                                                     |
| rs13387042                                                                         |                          | Intermediate IA anc | N=790  | 1.38 | 0.004  | 1.11-1.71 |                                                     |
| rs13387042                                                                         |                          | High IA anc         | N=252  | 1.65 | 0.057  | 0.98-2.75 |                                                     |
| <b>Pre-menopausal</b>                                                              |                          |                     |        |      |        |           |                                                     |
| rs13387042                                                                         |                          | Low IA anc          | N=195  | 1.23 | 0.333  | 0.81-1.87 | 0.339                                               |
| rs13387042                                                                         |                          | Intermediate IA anc | N=1195 | 1.18 | 0.052  | 1.00-1.40 |                                                     |
| rs13387042                                                                         |                          | High IA anc         | N=473  | 1.50 | 0.023  | 1.07-2.13 |                                                     |
| rs13387042                                                                         | Never                    |                     | N=324  | 1.01 | 0.96   | 0.72-1.42 | 0.014                                               |
| rs13387042                                                                         | ≤12 months               |                     | N=923  | 1.19 | 0.076  | 0.98-1.45 |                                                     |
| rs13387042                                                                         | >12 months               |                     | N=424  | 1.69 | <0.001 | 1.26-2.26 |                                                     |
| <b>Model with both months breastfeeding*SNP and Ancestry*SNP interaction terms</b> |                          |                     |        |      |        |           |                                                     |
| rs13387042                                                                         | Never                    | Low IA anc          | N=25   | 0.85 | 0.799  | 0.24-2.96 | Breastfeeding*SNP = 0.013<br>Ancestry*SNP = 0.176   |
| rs13387042                                                                         |                          | Intermediate IA anc | N=241  | 1.03 | 0.89   | 0.69-1.52 |                                                     |
| rs13387042                                                                         |                          | High IA anc         | N=56   | 1.44 | 0.56   | 0.43-4.84 |                                                     |
| rs13387042                                                                         | ≤12 months               | Low IA anc          | N=88   | 0.87 | 0.692  | 0.44-1.73 |                                                     |
| rs13387042                                                                         |                          | Intermediate IA anc | N=542  | 1.1  | 0.463  | 0.86-1.41 |                                                     |
| rs13387042                                                                         |                          | High IA anc         | N=293  | 1.38 | 0.13   | 0.91-2.11 |                                                     |
| rs13387042                                                                         | >12 months               | Low IA anc          | N=47   | 1.52 | 0.377  | 0.60-3.82 |                                                     |
| rs13387042                                                                         |                          | Intermediate IA anc | N=292  | 1.69 | 0.003  | 1.20-2.38 |                                                     |
| rs13387042                                                                         |                          | High IA anc         | N=83   | 2.22 | 0.122  | 0.81-6.10 |                                                     |
| <b>Post-menopausal</b>                                                             |                          |                     |        |      |        |           |                                                     |
| rs13387042                                                                         | Never                    |                     | N=720  | 1.22 | 0.057  | 0.99-1.51 | 0.554                                               |
| rs13387042                                                                         | ≤12 months               |                     | N=1058 | 1.20 | 0.047  | 1.00-1.45 |                                                     |
| rs13387042                                                                         | >12 months               |                     | N=726  | 1.33 | 0.016  | 1.05-1.67 |                                                     |
| <b>Model with both months breastfeeding*SNP and Ancestry*SNP interaction terms</b> |                          |                     |        |      |        |           |                                                     |
| rs13387042                                                                         | Never                    | Low IA anc          | N=113  | 0.96 | 0.863  | 0.57-1.61 | Breastfeeding*SNP = 0.727<br>Ancestry*SNP = 0.172   |
| rs13387042                                                                         |                          | Intermediate IA anc | N=534  | 1.22 | 0.117  | 0.95-1.56 |                                                     |
| rs13387042                                                                         |                          | High IA anc         | N=70   | 0.88 | 0.786  | 0.36-2.16 |                                                     |
| rs13387042                                                                         | ≤12 months               | Low IA anc          | N=103  | 1.27 | 0.42   | 0.71-2.30 |                                                     |
| rs13387042                                                                         |                          | Intermediate IA anc | N=645  | 1.04 | 0.755  | 0.82-1.31 |                                                     |
| rs13387042                                                                         |                          | High IA anc         | N=310  | 1.40 | 0.116  | 0.92-2.13 |                                                     |
| rs13387042                                                                         | >12 months               | Low IA anc          | N=79   | 1.38 | 0.347  | 0.71-2.70 |                                                     |
| rs13387042                                                                         |                          | Intermediate IA anc | N=480  | 1.23 | 0.169  | 0.92-1.64 |                                                     |
| rs13387042                                                                         |                          | High IA anc         | N=164  | 1.78 | 0.083  | 0.93-3.43 |                                                     |
| <b>rs13387042 &amp; Family History of Breast Cancer (BC)</b>                       |                          |                     |        |      |        |           |                                                     |
| rs13387042                                                                         | No family history BC     |                     | N=4144 | 1.30 | <0.001 | 0.19-1.42 | 0.114                                               |
| rs13387042                                                                         | Family history BC        |                     | N=460  | 1.07 | 0.627  | 0.82-1.39 |                                                     |
| <b>Model with both Family History*SNP and Ancestry*SNP interaction terms</b>       |                          |                     |        |      |        |           |                                                     |

|                                                                                |                      |                     |        |      |        |           |                             |
|--------------------------------------------------------------------------------|----------------------|---------------------|--------|------|--------|-----------|-----------------------------|
| rs13387042                                                                     | No family history BC | Low IA anc          | N=435  | 1.07 | 0.624  | 0.82-1.40 | Family History*SNP = 0.208  |
| rs13387042                                                                     |                      | Intermediate IA anc | N=2681 | 1.21 | 0.001  | 1.08-1.35 | Ancestry*SNP = 0.126        |
| rs13387042                                                                     |                      | High IA anc         | N=1028 | 1.48 | 0.001  | 1.17-1.86 |                             |
| rs13387042                                                                     | Family history BC    | Low IA anc          | N=91   | 1.34 | 0.350  | 0.73-2.47 |                             |
| rs13387042                                                                     |                      | Intermediate IA anc | N=325  | 0.96 | 0.806  | 0.69-1.33 |                             |
| rs13387042                                                                     |                      | High IA anc         | N=31   | 0.23 | 0.189  | 0.03-2.05 |                             |
| <b>rs7696175 &amp; Smoking</b>                                                 |                      |                     |        |      |        |           |                             |
| rs7696175                                                                      |                      | Low IA anc          | N=557  | 0.95 | 0.696  | 0.73-1.23 | 0.086                       |
| rs7696175                                                                      |                      | Intermediate IA anc | N=3096 | 1.17 | 0.003  | 1.06-1.30 |                             |
| rs7696175                                                                      |                      | High IA anc         | N=1077 | 1.21 | 0.036  | 1.01-1.45 |                             |
| rs7696175                                                                      | Never smoked         |                     | N=2922 | 1.24 | <0.001 | 1.11-1.38 | 0.096                       |
| rs7696175                                                                      | Ever smoked          |                     | N=1196 | 1.04 | 0.638  | 0.88-1.24 |                             |
| <b>Model with both Smoking*SNP and Ancestry*SNP interaction terms</b>          |                      |                     |        |      |        |           |                             |
| rs7696175                                                                      | Never smoked         | Low IA anc          | N=254  | 0.99 | 0.98   | 0.67-1.47 | Smoking*SNP = 0.135         |
| rs7696175                                                                      |                      | Intermediate IA anc | N=1839 | 1.28 | <0.001 | 1.12-1.46 | Ancestry*SNP = 0.206        |
| rs7696175                                                                      |                      | High IA anc         | N=829  | 1.27 | 0.022  | 1.04-1.55 |                             |
| rs7696175                                                                      | Ever smoked          | Low IA anc          | N=184  | 0.98 | 0.909  | 0.63-1.50 |                             |
| rs7696175                                                                      |                      | Intermediate IA anc | N=810  | 1.00 | 0.984  | 0.81-1.23 |                             |
| rs7696175                                                                      |                      | High IA anc         | N=202  | 1.24 | 0.373  | 0.77-2.00 |                             |
| <b>rs7696175 &amp; Age at Menarche</b>                                         |                      |                     |        |      |        |           |                             |
| rs7696175                                                                      | <11                  |                     | N=1056 | 1.01 | 0.925  | 0.85-1.20 | 0.149                       |
| rs7696175                                                                      | 11 to 13             |                     | N=2198 | 1.17 | 0.013  | 1.03-1.32 |                             |
| rs7696175                                                                      | >13                  |                     | N=1411 | 1.21 | 0.017  | 1.03-1.42 |                             |
| <b>Model with both Age at menarche*SNP and Ancestry*SNP interaction terms</b>  |                      |                     |        |      |        |           |                             |
| rs7696175                                                                      | <11                  | Low IA anc          | N=149  | 0.62 | 0.074  | 0.37-1.05 | Age at menarche*SNP = 0.179 |
| rs7696175                                                                      |                      | Intermediate IA anc | N=701  | 1.12 | 0.297  | 0.90-1.39 | Ancestry*SNP = 0.136        |
| rs7696175                                                                      |                      | High IA anc         | N=206  | 0.97 | 0.891  | 0.65-1.45 |                             |
| rs7696175                                                                      | 11 to 13             | Low IA anc          | N=265  | 0.97 | 0.879  | 0.67-1.41 |                             |
| rs7696175                                                                      |                      | Intermediate IA anc | N=1421 | 1.18 | 0.030  | 1.02-1.38 |                             |
| rs7696175                                                                      |                      | High IA anc         | N=512  | 1.24 | 0.100  | 0.96-1.60 |                             |
| rs7696175                                                                      | >13                  | Low IA anc          | N=137  | 1.26 | 0.450  | 0.69-2.30 |                             |
| rs7696175                                                                      |                      | Intermediate IA anc | N=937  | 1.19 | 0.077  | 0.98-1.44 |                             |
| rs7696175                                                                      |                      | High IA anc         | N=337  | 1.30 | 0.139  | 0.92-1.83 |                             |
| <b>rs7696175 &amp; Age at Menopause</b>                                        |                      |                     |        |      |        |           |                             |
| rs7696175                                                                      | <50                  |                     | N=1642 | 1.19 | 0.016  | 1.03-1.38 | 0.159                       |
| rs7696175                                                                      | ≥50                  |                     | N=844  | 1.02 | 0.873  | 0.84-1.24 |                             |
| <b>Model with both Age at Menopause*SNP and Ancestry*SNP interaction terms</b> |                      |                     |        |      |        |           |                             |
| rs7696175                                                                      | <50                  | Low IA anc          | N=175  | 1.10 | 0.703  | 0.68-1.77 | Age at menop.*SNP = 0.157   |
| rs7696175                                                                      |                      | Intermediate IA anc | N=1083 | 1.20 | 0.042  | 1.01-1.43 | Ancestry*SNP = 0.076        |
| rs7696175                                                                      |                      | High IA anc         | N=383  | 1.42 | 0.029  | 1.04-1.94 |                             |
| rs7696175                                                                      | ≥50                  | Low IA anc          | N=119  | 0.65 | 0.155  | 0.36-1.18 |                             |
| rs7696175                                                                      |                      | Intermediate IA anc | N=551  | 1.01 | 0.942  | 0.79-1.29 |                             |
| rs7696175                                                                      |                      | High IA anc         | N=173  | 1.34 | 0.183  | 0.87-2.07 |                             |

\*We only analyzed risk factors that showed SNP-risk factor interactions that were suggestive (P< 0.15) or statistically significant (P<0.02) for the three SNPs with previously reported SNP by ancestry interactions.

\*\*All models were adjusted for study, age at diagnosis/interview and models that include ancestry categories were also adjusted for continuous indigenous american ancestry
